# Supplementary material for: Dating the emergence of the first case of COVID-19 with flights: a retrospective modelling study&nbsp;
Source: Research Square preprint supplement (doi:10.21203/rs.3.rs-92854/v2), 2020-11-03
Supplement: Supplementary file 1 [file 4cd7f5b0f3215f9298a98efb.csv]

AF-ORU	386818
AF-PIA	551987
AF-HEL	924711
AF-LOW	392045
AF-BAM	487218
AF-GHO	790296
AF-GHA	1228831
AF-BDS	950953
AF-FRA	507405
AF-HER	1890202
AF-PAR	664502
AF-NAN	1517388
AF-KAB	4372977
AF-KAN	1226593
AF-FYB	998147
AF-BAL	1325659
AF-PKA	434742
AF-BDG	495958
AF-TAK	983336
AF-KDZ	1010037
AF-NIM	164978
AL-11	906166
DZ-27	737118
DZ-09	1002937
DZ-28	990591
DZ-06	912577
DZ-35	802083
DZ-33	34715
DZ-19	1489979
DZ-11	115043
DZ-18	636948
DZ-45	192891
DZ-36	408414
DZ-25	938475
DZ-04	621612
DZ-21	898680
DZ-12	648703
DZ-05	1119791
DZ-03	455602
DZ-17	1092184
DZ-14	846823
DZ-37	49149
DZ-02	1002088
DZ-31	1454078
DZ-13	949135
DZ-08	219898
DZ-22	604744
DZ-29	784073
DZ-32	228624
DZ-01	261258
DZ-07	547137
DZ-47	306322
DZ-30	311337
DZ-39	485281
AS-U-A	55212
AD-07	22440
AO-BIE	1455255
AO-MOX	758568
AO-CCU	534002
AO-HUA	2019555
AO-MAL	986363
AO-CNO	443386
AO-BGO	356641
AO-ZAI	594428
AO-BGU	2231385
AO-CAB	716076
AO-LNO	862566
AO-CNN	990087
AO-LUA	6945386
AO-NAM	495326
AO-UIG	1483118
AO-CUS	1881873
AO-LSU	537587
AO-HUI	2497422
AI-U-A	14731
AG-03	8055
AG-10	1634
AR-B	17196396
AR-Z	347593
AR-H	1180477
AR-R	728403
AR-S	3481514
AR-U	598380
AR-Q	646784
AR-E	1360443
AR-C	3068043
AR-X	3683937
AR-M	1949293
AR-K	408152
AR-G	958251
AR-F	383220
AR-T	1654388
AR-J	764464
AR-D	495629
AR-W	1101084
AR-P	595129
AR-N	1233177
AR-A	1388532
AR-Y	753891
AR-V	164944
AR-L	352378
AM-SH	243200
AM-ER	1073700
AW-U-A	112309
AU-WA	2639080
AU-NT	244761
AU-QLD	5129996
AU-SA	1759184
AU-VIC	6651074
AU-TAS	537012
AU-NSW	8128984
AU-ACT	427419
AT-8	397094
AT-6	1246576
AT-7	757852
AT-2	561390
AT-4	1490392
AT-5	558479
AT-9	1911728
AZ-BA	2092400
AZ-GA	316300
AZ-LA	209900
AZ-NX	84700
AZ-QAB	95600
AZ-ZAQ	543400
AZ-YE	119600
BS-BI	2008
BS-KB	273
BS-NB	3444
BS-MH	16692
BS-AC	560
BS-GT	450
BS-CI	1503
BS-EX	6928
BS-HI	1762
BS-GH	9363
BS-RS	961
BS-FP	51756
BS-HR	1000
BS-IN	911
BS-LI	3024
BS-MG	271
BS-NP	248948
BS-RI	70
BS-SR	930
BH-15	189114
BD-4	268279
BD-1	388335
BD-2	33098
BD-5	1476090
BD-6	339308
BD-3	540000
BB-01	54336
BY-BR	1348115
BY-HO	1388512
BY-VI	1135731
BY-HR	1026816
BY-MI	1471240
BY-MA	1024751
BE-VAN	1857986
BE-BRU	1208542
BE-WHT	1344241
BE-VWV	1195796
BE-WLG	1106992
BZ-CY	99118
BZ-SC	44720
BZ-BZ	124096
BZ-CZL	49446
BZ-OW	52550
BZ-TOL	38557
BJ-AQ	1396548
BJ-DO	542605
BJ-AL	868046
BJ-AK	769337
BJ-BO	1202095
BJ-CO	716558
BM-U-A	71176
BT-41	45518
BT-33	17820
BT-31	46004
BT-11	46316
BQ-U-A	25987
BA-SRP	1218107
BA-BIH	2219220
BW-KG	50752
BW-NE	60264
BW-GH	43095
BW-SO	197767
BW-NW	142970
BW-SE	85014
BW-CE	576064
BR-PA	8602865
BR-MT	3484466
BR-RS	11377239
BR-CE	9132078
BR-MA	7075181
BR-TO	1572866
BR-SP	45919049
BR-SE	2298696
BR-MG	21168791
BR-PR	11433957
BR-DF	3015268
BR-RR	605761
BR-RJ	17264943
BR-SC	7164788
BR-MS	2778986
BR-GO	7018354
BR-BA	14873064
BR-AC	881935
BR-AM	4144597
BR-PE	9557071
BR-RO	1777225
BR-PB	4018127
BR-AL	3337357
BR-AP	845731
BR-RN	3506853
BR-PI	3273227
BR-ES	4018650
BN-BM	319500
BG-26	246238
BG-28	131447
BG-02	415817
BG-04	258494
BG-16	683027
BG-18	235252
BG-23	247489
BG-19	119474
BG-24	333265
BG-25	120818
BG-03	475074
BF-SMT	837848
BF-YAT	762041
BF-SOM	348342
BF-SIS	240830
BF-NAO	221543
BF-NAM	462757
BF-GNA	579680
BF-TAP	506868
BF-SEN	43
BF-GOU	1243500
BF-OUD	288036
BF-KMP	125961
BF-BLG	766784
BF-KAD	2854356
BF-COM	1203000
BF-MOU	1976217
BF-PON	362641
BF-KOS	378353
BF-HOU	1401805
BF-SOR	295305
BF-BGR	144000
BI-BJ	961984
BI-GI	725223
BI-U-A
KH-7	49597
KH-13	24400
KH-2	147349
KH-4	538163
KH-9	36053
KH-10	38215
KH-11	60811
KH-8	2913000
KH-16	204027
KH-17	139458
KH-19	30959
KH-18	199902
KH-15	25650
CM-LT	3174437
CM-SU	761099
CM-SW	1481433
CM-NW	1900547
CM-EN	3803138
CM-ES	824204
CM-OU	1865394
CM-AD	1131978
CM-NO	3803138
CM-CE	3919828
CA-NB	780890
CA-YT	41293
CA-QC	8552362
CA-NU	39486
CA-MB	1379121
CA-NT	44982
CA-NL	520437
CA-ON	14745040
CA-BC	5120184
CA-AB	520437
CA-SK	1181987
CA-NS	978274
CA-PE	158717
KY-U-A	65813
CF-HS	364795
CF-MP	356725
CF-MB	164008
CF-VR	52255
CF-UK	276710
CF-BB	43229
CF-NM	233666
CF-HK	90316
CF-AC	369220
CF-HM	57602
CF-OP	430506
TD-SA	302301
TD-MC	588008
TD-MK	1339252
TD-OD	721166
TD-LO	689044
TD-TA	661906
TD-BA	488458
TD-CB	578425
TD-LC	433790
TD-GR	538359
TD-KA	333387
TD-BET	93584
CL-LL	828708
CL-VS	1815902
CL-AP	226068
CL-AI	103158
CL-AT	286168
CL-AN	607534
CL-MA	166533
CL-BI	1556805
CL-CO	757586
CL-TA	330558
CL-RM	7112808
CL-ML	1044950
CL-AR	957224
CL-LI	914555
CL-LR	384837
CN-15	24706321
CN-51	80418200
CN-13	71854202
CN-64	6301350
CN-53	45966239
CN-50	28846170
CN-54	3002166
CN-44	104303132
CN-36	44567475
CN-45	46026629
CN-37	95793065
CN-21	43746323
CN-65	21813334
CN-62	25575254
CN-32	78659903
CN-22	27462297
CN-23	38312224
CN-63	5626722
CN-41	94023567
CN-34	59500510
CN-35	36894216
CN-43	65683722
CN-11	19612368
CN-14	35712111
CN-42	57237740
CN-61	37327378
CN-12	12938224
CN-46	9171300
CN-U-A
CN-33	54426891
CN-31	23019148
CN-52	34746468
HK-U-A	7451000
MO-U-A	631636
TW-X-KM	11581061
TW-X-LK	11581061
TW-TTT	106929
TW-KHH	2773000
TW-CYQ	270254
TW-PIF	839001
TW-TXG	2817000
TW-TNN	1881000
TW-HSZ	448207
TW-PEN	101758
TW-TPE	2646000
TW-TAO	2245000
TW-HUA	106368
CO-CUN	2919060
CO-ARA	262174
CO-AMA	76589
CO-SAN	2184837
CO-MET	1039722
CO-ANT	6407102
CO-CAQ	401849
CO-CAS	420504
CO-CES	1200574
CO-CHO	534826
CO-COR	1784783
CO-GUA	48114
CO-HUI	1100386
CO-NAR	1630592
CO-TOL	1330187
CO-VAC	4475886
CO-VAU	40797
CO-VID	107808
CO-QUI	539904
CO-PUT	348182
CO-MAG	1341746
CO-ATL	2535517
CO-NSA	1491689
CO-BOL	2070110
CO-SUC	904863
CO-CAU	1464488
CO-LAG	880560
CO-GUV	82767
CO-CAL	998255
CO-RIS	943401
CO-SAP	61280
CO-BOY	1217376
KM-G	279471
KM-M	35400
KM-A	341539
CG-8	156044
CG-12	236595
CG-14	174591
CG-11	309063
CG-2	96393
CG-9	231271
CG-7	154155
CG-13	85738
CG-5	91955
CK-U-A	17459
CR-A	885571
CR-L	386862
CR-P	410929
CR-G	354154
CR-SJ	1404242
CR-H	433677
HR-19	122568
HR-08	296195
HR-14	305032
HR-18	208055
HR-17	454798
HR-21	790017
HR-13	170017
CU-11	1027683
CU-14	506369
CU-07	462114
CU-12	830645
CU-08	424750
CU-06	400768
CU-99	84263
CU-09	768311
CU-04	679314
CU-13	1053837
CU-03	2154454
CU-01	585452
CU-02	2130517
CU-05	783708
CU-10	525729
CY-03	145365
CY-02	239842
CY-04	47338
CY-06	31015
CZ-ZL	192994
CZ-KA	121886
CZ-MO	1203299
CZ-OL	224156
CZ-PA	160251
CZ-PR	1181610
CZ-JM	1188000
CZ-ST	10690000
CI-13	1203052
CI-01	1478047
CI-05	601526
CI-03	1607497
CI-04	1440826
CI-08	934352
CI-11	601526
CI-02	1185960
CI-19	1185960
CI-09	2280548
CI-06	2371920
CI-10	289779
CI-14	845139
CI-17	845139
CI-07	1258604
KP-10	719269
KP-09	2327362
KP-01	3255288
KP-08	3066013
KP-07	1477582
DK-82	1326340
DK-83	1223105
DK-84	1846023
DK-81	589936
DK-85	837359
DJ-DJ	748000
DJ-AS	71640
DJ-OB	37856
DJ-TA	89567
DM-10	307695
DM-02	573369
DO-04	232818
DO-16	52165
DO-20	139707
DO-13	447905
DO-01	1402749
DO-12	344580
DO-11	372289
DO-18	498232
DO-22	317293
DO-25	1543362
EC-S	196535
EC-T	590600
EC-D	161338
EC-A	881394
EC-W	33042
EC-G	4387434
EC-M	1562079
EC-X	488716
EC-L	521154
EC-O	715751
EC-U	230503
EC-P	3228233
EC-Y	114202
EC-E	643654
EC-C	186869
EC-N	133705
EG-JS	105953
EG-C	9788739
EG-MT	461847
EG-MN	5745212
EG-SIN	463975
EG-WAD	249399
EG-ALX	5299718
EG-ASN	1532400
EG-GZ	8915164
EG-BA	372862
EG-KN	3302894
EG-SHG	5193052
EG-SHR	8018000
SV-PA	328221
GQ-AN	5314
GQ-LI	367348
GQ-WN	192017
GQ-BN	300374
GQ-CS	141986
ER-SK	897454
ER-DK	398073
ER-GB	1103742
EE-39	9387
EE-74	33108
EE-67	85938
EE-37	598059
EE-7B	152977
ET-SO	6453000
ET-TI	5056000
ET-AA	3273000
ET-SN	11426000
ET-AM	27401000
ET-BE	1005000
ET-GA	409000
ET-DD	440000
ET-OR	33692000
ET-AF	1723000
FM-TRK	48654
FM-KSA	6616
FM-PNI	36196
FM-YAP	11377
FK-U-A	3398
FO-U-A	52337
FJ-W	337071
FJ-N	131918
FJ-E	36156
FJ-C	378148
FJ-R	1594
FI-LL	177161
FI-LS	1380000
FI-ES	1157000
FI-IS	569832
FI-OL	208939
FI-AL	28007
FR-L	741047
FR-U	5059000
FR-Q	1848000
FR-O	4087000
FR-S	1925000
FR-B	3335000
FR-T	1806000
FR-N	2967000
FR-R	3787000
FR-A	1890000
FR-I	1180000
FR-V	6449000
FR-C	1359000
FR-M	2331000
FR-H	339178
FR-D	1644000
FR-F	2567000
FR-K	2727000
FR-G	1334000
FR-J	12210000
FR-E	3329000
FR-P	1477000
GF-CY	145345
GF-SL	145345
PF-U-A	277679
GA-3	38775
GA-8	136462
GA-6	136462
GA-4	36061
GA-5	57996
GA-7	65771
GA-9	154986
GA-2	250799
GA-1	895689
GM-W	699704
GE-IM	487000
GE-AJ	480209
GE-AB	240705
GE-TB	1158700
DE-BR	2511917
DE-BW	11069533
DE-TH	2143145
DE-MV	1609675
DE-SN	4077937
DE-ST	2208321
DE-HE	6265809
DE-NW	17932651
DE-HH	1841179
DE-BE	3644826
DE-BY	13076721
DE-SL	990509
DE-NI	7982448
DE-HB	682986
DE-RP	4084844
DE-SH	2896712
GH-AA	4010054
GH-NP	3573000
GH-AH	11000000
GH-BA	2310983
GH-WP	3093201
GI-U-A	34003
GR-14	159300
GR-01	200617
GR-71	8551
GR-A1	3743000
GR-43	4266
GR-85	51930
GR-11	97044
GR-84	32977
GR-33	167696
GR-91	313766
GR-56	46668
GR-23	35801
GR-81	16179
GR-17	159954
GR-22	101569
GR-55	56371
GR-58	70000
GR-83	86436
GR-42	281033
GR-82	112615
GR-34	19042
GR-13	298996
GR-94	159576
GR-16	248464
GR-92	74006
GR-04	191206
GR-54	1105000
GR-21	40759
GL-U-A	56025
GD-GE	111454
GD-PA	10503
GP-U-A	395700
GU-U-A	165768
GT-CQ	415063
GT-PE	545600
GT-ES	733181
GT-QC	949261
GT-AV	1215038
GT-QZ	799101
GT-GU	3015081
GT-HU	1170669
GT-IZ	408688
GT-RE	326828
GN-C	1667864
GN-B	1081445
GN-F	942733
GN-L	995717
GN-N	1663582
GN-K	1986329
GW-BL	34563
GW-BS	1950000
GY-BA	26941
GY-PT	10190
GY-UT	24212
GY-CU	20280
GY-DE	313429
GY-EB	109431
HT-SD	774976
HT-ND	1067177
HT-SE	632601
HT-GA	468301
HT-OU	4029705
HT-NO	728807
HN-LE	321179
HN-CR	1562394
HN-GD	90765
HN-OL	520761
HN-LP	198926
HN-YO	570595
HN-CL	309926
HN-AT	436252
HN-IN	232553
HN-IB	62557
HN-CP	371057
HN-CM	493466
HN-FM	1508906
HU-PE	1217476
HU-HB	546721
HU-BZ	686266
HU-BA	386441
HU-ZA	282179
HU-SO	317307
IS-6	30600
IS-4	7115
IS-7	13173
IS-5	7322
IS-3	16662
IS-8	28399
IS-2	27829
IS-1	233034
IN-KA	61095297
IN-CT	25545198
IN-TN	72147030
IN-JK	12258433
IN-AR	1383727
IN-MM
IN-TG	35193978
IN-MP	72626809
IN-GJ	60439692
IN-DD	586956
IN-GA	1458545
IN-RJ	68548437
IN-TR	3673917
IN-WB	91276115
IN-ML	2966889
IN-OR	41974218
IN-BR	104099452
IN-UP	199812341
IN-AS	31205576
IN-MN	2855794
IN-JH	32988134
IN-MZ	1097206
IN-NL	1978502
IN-AP	49506799
IN-PB	27743338
IN-HP	6864602
IN-CH	1055450
IN-UL	10086292
IN-DL	16787941
IN-HR	25351462
IN-LD	64473
IN-KL	33406061
IN-AN	380581
IN-U-A
ID-PA	3143088
ID-JB	46668214
ID-JI	38828061
ID-PB	868819
ID-LA	8109601
ID-ST	2872857
ID-KI	3422676
ID-JA	3397164
ID-JT	33753023
ID-NT	5112760
ID-NB	4830118
ID-SS	8043042
ID-KU	639639
ID-SG	2495248
ID-SB	5190577
ID-BA	4148588
ID-KT	2490178
ID-MA	1683856
ID-SN	8512608
ID-MU	1160275
ID-GO	1131670
ID-SA	2409921
ID-KS	3984315
ID-YO	3675768
ID-RI	6330941
ID-JK	10154134
ID-BT	11934373
ID-SU	13923262
ID-BB	1370331
ID-KB	4783209
ID-BE	1872136
ID-AC	4993385
IR-02	3080576
IR-23	1776415
IR-10	4936000
IR-18	658629
IR-06	1163400
IR-17	1952434
IR-05	580158
IR-20	1760649
IR-16	1603011
IR-04	5343000
IR-08	947763
IR-19	2530696
IR-24	1738234
IR-22	1429475
IR-07	13267637
IR-28	1273761
IR-U-A
IR-12	631218
IR-15	3164718
IR-29	768898
IR-30	6434501
IR-31	867727
IR-25	1138533
IR-27	1868819
IR-21	3283582
IR-14	4851274
IR-03	1270420
IR-01	3724620
IR-11	1057461
IR-13	2775014
IQ-AN	1771656
IQ-DA	1292535
IQ-SD	1595235
IQ-BG	7055200
IQ-NI	3270422
IQ-AR	2113391
IQ-TS	1395600
IQ-BA	2532000
IQ-NA	1285500
IQ-SW
IE-C	550742
IE-MO	130507
IE-G	258058
IE-DL	159192
IE-D	1345402
IE-KK	99232
IE-KY	147707
IE-CE	118817
IE-SO	65535
IE-WD	116176
IM-U-A	83314
IL-M	2196100
IL-D	1302000
IL-HA	1032800
IL-Z	1448100
IL-TA	1427200
IT-75	4029053
IT-65	1311580
IT-78	1947131
IT-82	4999891
IT-34	4905854
IT-45	4459477
IT-88	1639591
IT-25	10060574
IT-21	4356406
IT-42	1550640
IT-23	125666
IT-36	1215220
IT-32	1072276
IT-57	1525271
IT-52	3729641
IT-62	5879082
IT-72	5801692
IT-55	882015
JM-05	113615
JM-01	89057
JM-08	183811
JM-04	81744
JM-09	69533
JM-02	573369
JP-47	1434138
JP-39	728461
JP-12	6224027
JP-20	2099759
JP-08	2917857
JP-13	13513734
JP-27	8838908
JP-30	963850
JP-28	5536989
JP-34	2844963
JP-01	5383579
JP-43	1786969
JP-42	1377780
JP-35	1405007
JP-46	1648752
JP-40	5102871
JP-45	1104377
JP-44	1166729
JP-41	833245
JP-23	7484094
JP-18	787099
JP-21	2032533
JP-17	1154343
JP-32	694188
JP-22	3701181
JP-16	1066883
JP-33	1922181
JP-38	1385840
JP-31	573648
JP-36	756063
JP-37	976756
JP-02	1308649
JP-06	1122957
JP-15	2305098
JP-07	1913606
JP-03	1279814
JP-05	1022839
JP-04	2334215
JO-AM	2473400
JO-AQ	139200
JO-MA	1776000
KZ-KAR	1341700
KZ-ALM	1807894
KZ-BAY	36175
KZ-AKM	737495
KZ-SEV	596535
KZ-ZHA	1022129
KZ-YUZ	603499
KZ-KZY	678794
KZ-ZAP	598880
KZ-PAV	742475
KZ-VOS	1396593
KZ-MAN	485392
KZ-ATY	510377
KZ-AKT	757768
KZ-KUS	885570
KE-300	4329474
KE-700	12752966
KE-500	2490073
KE-110	4397073
KE-900	5021843
KE-600	6269579
KE-400	6821049
KE-200	5482239
KI-G	93185
KI-P	60
KI-L	8809
KW-AH	959009
KW-FA	1169312
KG-Y	463900
KG-C	870300
KG-O	270300
LA-PH	177989
LA-AT	139628
LA-BK	179243
LA-LP	431889
LA-LM	175753
LA-OU	307622
LA-CH	694023
LA-XA	381376
LA-SV	969697
LA-HO	289393
LA-SL	396942
LA-KH	392052
LA-VT	820940
LA-XI	419090
LV-DA	237023
LV-LE	46609
LV-RIX	658640
LV-VEN	38750
LB-JL	1831533
LB-AS	782436
LS-H	74566
LS-C	337521
LS-F	165590
LS-E	178222
LS-J	100442
LS-A	519186
LS-G	115469
LS-K	135347
LR-LO	270114
LR-GB	224839
LR-MY	136404
LR-SI	104932
LR-MO	1144806
LR-NI	468088
LR-MG	199689
LR-GK	57106
LR-GG	126146
LR-RI	65862
LY-SR	141378
LY-BU	159536
LY-GT	23518
LY-KF	50104
LY-BA	631555
LY-TB	1065405
LY-JA	206180
LY-SB	134162
LY-WA	164718
LY-JU	52342
LY-NL	93224
LY-JG	304159
LY-NQ	292440
LY-SH	78532
LY-DR	163351
LY-MI	550938
LT-KU	15200
LT-KL	15100
LT-PN	11000
LT-SA	11500
LT-VL	21300
LU-L	626108
MG-U	2229550
MG-M	1896000
MG-T	5370900
MG-A	300813
MG-D	1188425
MG-F	3366291
MW-RU	229161
MW-BL	1251484
MW-MG	1148611
MW-NK	395897
MW-KR	365028
MW-KS	842953
MW-LI	2626901
MW-LK	14527
MW-SA	478346
MW-MZ	1157522
MW-MH	735438
MY-12	3904700
MY-13	2818100
MY-01	3768200
MY-15	99400
MY-06	1677100
MY-08	2514300
MY-02	2185900
MY-07	1777600
MY-03	1892200
MY-11	1250100
MY-14	1778400
MY-04	932700
MY-10	6541900
MV-13	14934
MV-20	8919
MV-29	8095
MV-01	19827
MV-23	10189
MV-05	11841
MV-MLE	133412
MV-27	8477
MV-28	11653
MV-17	5329
MV-08	8923
ML-2	2422108
ML-6	674793
ML-7	542304
ML-1	1993615
ML-3	2643179
ML-5	2036209
MT-62	3300
MT-25	6162
MH-UTI	300
MH-ALL	1729
MH-KWA	11408
MH-EBO	706
MH-MIL	738
MH-NMU	780
MH-ALK	339
MH-AUR	499
MH-BIK	548
MH-MAL	682
MH-LIK	401
MH-LAE	347
MH-MEJ	348
MH-NMK	780
MH-RON	79
MH-ARN	1794
MH-JAL	1788
MH-WTJ	859
MH-WTN	97
MH-ENI	664
MH-MAJ	27797
MH-KIL	548
MH-UJA	364
MQ-U-A	376480
MR-07	62658
MR-02	294109
MR-06	272773
MR-09	80962
MR-05	312277
MR-03	325897
MR-01	430668
MR-12	19639
MR-04	335917
MR-NKC	958399
MR-10	267029
MR-11	53261
MR-08	123779
MU-GP	116211
MU-VP	387372
YT-U-A	279471
MX-SON	2850330
MX-BCN	3315766
MX-JAL	7844830
MX-YUC	2097175
MX-GRO	3533251
MX-NLE	5119504
MX-AGU	1312544
MX-OAX	3967889
MX-MOR	1903811
MX-COA	2954915
MX-CAM	899931
MX-CHH	3556574
MX-SIN	3210000
MX-ROO	1501562
MX-CHP	5217908
MX-TAM	3441698
MX-GUA	5853677
MX-BCS	712029
MX-DUR	1754754
MX-NAY	1181050
MX-PUE	6168883
MX-COL	711235
MX-VER	8112505
MX-MEX	16187608
MX-MIC	4584471
MX-DIF	8851080
MX-QUE	2038372
MX-SLP	2717820
MX-TAB	2395272
MX-ZAC	1579209
MC-U-A	8300
MN-035	101652
MN-041	132146
MN-059	46383
MN-071	101591
MN-055	115684
MN-065	57440
MN-069	87243
MN-067	62027
MN-053	65645
MN-043	87363
MN-051	61323
MN-061	76507
MN-057	72104
MN-073	94923
MN-1	1444669
MN-046	82604
MN-039	76019
ME-03	11073
ME-16	150977
ME-19	14031
ME-21	4204
MS-U-A	4649
MA-AGD	2676847
MA-TNT	70146
MA-TIZ	344831
MA-FIG	138325
MA-FES	4236892
MA-ERR	1635008
MA-MEK	4236892
MA-OUJ	46129
MA-CAS	6861739
MA-BEM	2520776
MA-RBA	577827
MA-BAH	297245
MA-ESI	339818
MA-NAD	522663
MA-MAR	4520569
MA-KEN	4580866
MA-OUA	499980
MA-HOC	1185576
MA-TET	1185576
MA-TNG	1185576
MA-LAA	367758
MZ-Q	5110787
MZ-I	1496824
MZ-S	2221803
MZ-N	6102867
MZ-A	1865976
MZ-B	1911237
MZ-L	1101170
MZ-MPM	2507098
MZ-P	2333278
MZ-T	2764169
MZ-G	1446654
MM-07	6184829
MM-16	3188807
MM-04	6165723
MM-11	1689441
MM-05	1408401
MM-03	3917055
MM-17	5824432
MM-01	5325347
MM-12	286627
MM-15	2054393
MM-13	1574079
MM-02	4867373
MM-06	7360703
NA-KU	86856
NA-ER	150809
NA-OH	71233
NA-OD	143903
NA-OT	181973
NA-KA	77421
NA-CA	90596
NA-ON	176674
NA-KE	115447
NA-HA	109781
NA-KH	342141
NR-14	10670
NP-BA	3008487
NP-SE	1000000
NP-KO	2335047
NP-DH	556191
NP-NA	2702073
NP-MA	2249636
NP-LU	2249636
NP-ME	2267472
NP-RA	579984
NP-BH	6069690
NP-KA	1570418
NP-GA	2403757
NP-JA	2702073
NP-SA	2267472
NL-NH	2879527
NL-LI	1117201
NL-NB	2562955
NL-DR	493682
NL-FL	423021
NL-FR	649957
NL-ZH	3708696
NL-UT	1354834
NL-OV	1162406
NC-U-A	271407
NZ-AUK	1642800
NZ-WKO	482100
NZ-CAN	628600
NZ-WGN	527800
NZ-NTL	188700
NZ-OTA	236200
NZ-WTC	32600
NZ-GIS	49300
NZ-STL	101200
NZ-TAS	54800
NZ-TKI	122700
NZ-HKB	173700
NZ-NSN	52900
NZ-MWT	234500
NZ-MBH	49200
NZ-BOP	324200
NI-AS	306510
NI-AN	480874
NI-RI	177668
NI-MN	1484462
NI-SJ	127225
NE-4	3402094
NE-8	1026848
NE-5	3328365
NE-1	487620
NE-7	3539764
NG-KT	7831319
NG-FC	3564126
NG-AK	5482177
NG-ON	4671695
NG-DE	5663362
NG-BA	6537314
NG-ED	4235595
NG-CR	3866269
NG-EN	4411119
NG-OY	7840864
NG-KW	3192893
NG-IM	5408756
NG-PL	4200442
NG-KD	8252366
NG-KN	13076892
NG-BO	5860183
NG-BE	5741815
NG-LA	17500000
NG-NI	5556247
NG-RI	7303924
NG-SO	4998090
NG-AD	4248436
NG-GO	3256962
NU-U-A	1620
MP-U-A	53883
NO-15	265181
NO-18	241948
NO-20	75886
NO-14	109623
NO-12	517601
NO-10	182922
NO-06	278028
NO-19	243311
NO-03	660987
NO-05	188945
NO-02	596704
NO-04	195443
NO-11	470907
NO-17	225248
NO-08	172527
NO-16	225248
NO-01	290412
NO-21	2939
NO-07	419396
OM-WU	42111
OM-MU	31425
OM-DA	326651
OM-BA
OM-BU	72917
OM-ZA	224225
OM-SH	121088
OM-MA	1475795
OM-ZU	458734
PK-SD	47886051
PK-PB	110012442
PK-NW	35525047
PK-NA	1249000
PK-BA	12344408
PK-JK	4045366
PK-TA	5001676
PW-004	17907
PA-KY	33109
PA-5	48378
PA-8	1249032
PA-7	89592
PA-1	125461
PA-6	109955
PA-4	416873
PA-3	241928
PA-10	464038
PA-2	233708
PA-9	226991
PG-WPD	201351
PG-CPM	269756
PG-EHG	579825
PG-MPL	674810
PG-NPP	186309
PG-ESW	328369
PG-SHM	510245
PG-MPM	493906
PG-SAN	450530
PG-MBA	276512
PG-WBK	264264
PG-NIK	194067
PG-MRL	50231
PG-EPW	432045
PG-NSB	249358
PG-CPK	376473
PG-GPK	158194
PG-HE	249449
PG-WHM	362850
PG-EBR	328369
PG-NCD	364125
PG-JI	343987
PY-16	11587
PY-1	179450
PY-11	1362893
PY-8	101783
PY-7	453692
PY-10	558672
PY-19	41106
PY-12	76348
PY-13	114917
PE-HUC	730871
PE-ICA	665592
PE-MDD	92024
PE-LOR	884144
PE-SAM	669973
PE-UCA	402445
PE-ANC	1039415
PE-LAM	1091535
PE-AYA	619338
PE-APU	418882
PE-CUS	1171503
PE-LIM	864853
PE-CAJ	1359023
PE-JUN	1091619
PE-PUN	1245508
PE-AMA	389700
PE-MOQ	159306
PE-TUM	191713
PE-ARE	1140810
PE-LAL	1539774
PE-TAC	274496
PE-PIU	1630772
PH-DAO	558958
PH-AUR	214336
PH-PLW	1104585
PH-ILI	2384415
PH-SUK	812095
PH-MSR	1564459
PH-ZAN	1011393
PH-BAS	459367
PH-ZMB	823888
PH-PAM	2609744
PH-ILN	593081
PH-U-A
PH-ALB	1314826
PH-CAV	3678301
PH-MDC	487414
PH-SCO	1509735
PH-MAG	1473371
PH-DAV	1016332
PH-AGN	691566
PH-SUR	592250
PH-CAM	88478
PH-LAN	1019013
PH-SLU	824731
PH-LAS	1045429
PH-TAW	390715
PH-MSC	602126
PH-ZAS	633129
PH-SUN	485088
PH-ZSI	633129
PH-BEN	791590
PH-CAN	583313
PH-CAS	1952544
PH-BTN	17246
PH-LUN	786653
PH-CAG	1199320
PH-CAT	260964
PH-MAD	234521
PH-ISA	1593566
PH-LEY	1966768
PH-NEC	3059136
PH-WSA	780481
PH-NER	1354995
PH-AKL	574823
PH-NSA	632379
PH-MAS	892393
PH-CEB	4632359
PH-CAP	761384
PH-ANT	582012
PH-BOH	1313560
PH-ROM	292781
PH-BUK	1415226
PL-LU	2117619
PL-KP	2077775
PL-SL	4533565
PL-PM	2333523
PL-MA	3400577
PL-ZP	1701030
PL-LD	2466322
PL-MZ	5403412
PL-WP	3493969
PL-PK	2129015
PL-WN	1428983
PL-DS	2901225
PL-LB	1014548
PT-11	470930
PT-20	246772
PT-04	136252
PT-02	152758
PT-03	848185
PT-17	206661
PT-08	451006
PT-30	289000
PT-10	470930
PT-13	1817117
PT-15	851258
PT-18	377653
PR-U-A	3193694
QA-DA	956457
QA-RA	605712
KR-49	583284
KR-28	2954955
KR-46	1938136
KR-29	1490092
KR-45	1895882
KR-42	1549780
KR-48	3374725
KR-26	3411829
KR-31	1163690
KR-41	12239862
KR-11	9733509
KR-44	2064665
KR-47	2700328
KR-27	2489802
KR-43	1588633
RO-AR	430629
RO-BC	616168
RO-MM	478659
RO-B	1883425
RO-CT	684082
RO-CJ	691106
RO-CS	295579
RO-DJ	660544
RO-IS	772348
RO-BH	575398
RO-SB	397322
RO-SM	344360
RO-SV	634810
RO-TL	213083
RO-MS	550846
RO-TM	683540
RU-PRI	2071210
RU-SA	546695
RU-SAK	546695
RU-CE	1103686
RU-VLG	1269568
RU-AMU	902844
RU-KHA	1436570
RU-CHU	53824
RU-MAG	182726
RU-KAM	358801
RU-CHI	1155346
RU-IRK	2581705
RU-BU	981238
RU-ARK	1336539
RU-NEN	41546
RU-SPE	4662547
RU-MUR	892534
RU-NGR	694355
RU-PSK	760810
RU-KR	716281
RU-LEN	1669205
RU-KGD	955281
RU-KK	546072
RU-ALT	2607426
RU-AL	202947
RU-KEM	2899142
RU-KYA	2966042
RU-TY	305510
RU-NVS	2692251
RU-OMS	2079220
RU-TOM	1046039
RU-KDA	5125221
RU-DA	2576531
RU-STA	2735139
RU-KB	292410
RU-SE	710275
RU-IN	467294
RU-ROS	4404013
RU-AST	1005276
RU-KL	292410
RU-VGG	2699223
RU-CHE	3603339
RU-BA	4104336
RU-YAN	507006
RU-KHM	1432817
RU-UD	1570316
RU-KIR	1503529
RU-PER	2819421
RU-SVE	4486214
RU-TYU	3264841
RU-KGN	1019532
RU-KOS	736641
RU-MOS	6618538
RU-KLU	1041641
RU-IVA	1148329
RU-YAR	1367398
RU-BRY	1378941
RU-TVE	1471459
RU-BEL	1511620
RU-KRS	1019532
RU-LIP	1213499
RU-VOR	2378803
RU-ORL	860262
RU-TAM	1178443
RU-RYA	1227910
RU-TUL	1675758
RU-KO	736641
RU-NIZ	3524028
RU-TA	3779265
RU-ME	727979
RU-CU	1313754
RU-ULY	1382811
RU-ORE	124000
RU-PNZ	1452941
RU-MO	888766
RU-SAR	2668310
RU-SAM	3239737
RU-SMO	1049574
RW-04	2471239
RW-05	2589975
RW-01	1132686
RW-03	1726370
BL-U-A	9793
KN-U-A	52441
LC-02	65656
LC-11	16284
MF-U-A	35334
PM-ML	3000
PM-SP	3000
VC-U-A
VC-06	9200
VC-04	51400
WS-VS	6543
WS-AA	23265
WS-TU	95907
WS-PA	9300
ST-P	8420
ST-S	193380
SA-14	476172
SA-04	4900325
SA-11	476172
SA-01	8216284
SA-09	1567547
SA-05	1215858
SA-08	375310
SA-06	699774
SA-02	508475
SA-03	1423935
SA-10	582243
SA-12	508475
SA-07	910030
SN-DK	3137196
SN-KD	714392
SN-ZG	549151
SN-FK	835352
SN-SL	908942
SN-TC	681310
RS-00	1166763
RS-07	311053
RS-20	373404
RS-06	615371
SC-15	3506
SC-20	3245
SC-14	4056
SL-S	1438572
SL-W	1162065
SL-N	2502865
SL-E	1641012
SG-04	1901200
SG-03	1901200
SG-02	1901200
SX-U-A	41486
SK-BL	659598
SK-KI	800414
SK-BC	647875
SK-TA	563591
SK-PV	825022
SK-ZI	691368
SI-061	282994
SI-070	111374
SI-090	17882
SB-ML	137596
SB-MK	40419
SB-WE	76649
SB-RB	3041
SB-CH	26371
SB-IS	26158
SB-CT	64609
SB-GU	93613
SB-TE	21362
SB-CE	26051
SO-GA	800000
SO-GE	508405
SO-BR	719512
SO-BY	1467345
SO-NU	392698
SO-WO	1242003
SO-JH	267000
SO-BN	1650227
SO-HI	520685
SO-MU	717863
SO-SA	544123
SO-TO	721363
ZA-NC	1145861
ZA-NP	5404868
ZA-EC	6562053
ZA-FS	2745590
ZA-WC	5822734
ZA-NL	10267300
ZA-GT	12272263
ZA-NW	3509953
ZA-MP	4039939
ZA-U-A
SS-23	2745000
SS-18	2745000
SS-17	2745000
SS-14	2745000
ES-CA	1236739
ES-CN	2045168
ES-CE	79294
ES-ML	76047
ES-CM	2084470
ES-V	4989631
ES-AN	8276017
ES-O	1084341
ES-PV	1153724
ES-CL	2547408
ES-CT	7463471
ES-EX	1096421
ES-CS	604274
ES-GA	2747226
ES-M	6373532
ES-GE	753046
ES-AR	1344184
ES-PM	1077103
ES-MU	1453545
ES-LO	319939
ES-NA	633017
ES-S	588518
LK-5	1555510
LK-1	5851130
LK-6	2380861
LK-2	2571557
LK-3	2477285
LK-4	1061315
LK-7	1266663
SD-DE	1119451
SD-13	1111859
SD-04	1472257
SD-01	833743
SD-24	832112
SD-02	1583179
SD-06	1369300
SD-25	1532085
SD-12	2086282
SD-05	2519071
SD-08	1140694
SD-09	2529370
SD-11	2890348
SD-26	1482053
SD-03	7993235
SD-07	5096920
SR-SI	37065
SR-MA	18294
SR-CR	3391
SR-PR	24700
SR-NI	34233
SR-PM	240924
SE-K	159606
SE-Q	579281
SE-F	363599
SE-T	304805
SE-W	287966
SE-D	297540
SE-M	1377827
SE-H	201469
SE-N	333848
SE-G	201469
SE-Z	130810
SE-BD	250093
SE-X	287382
SE-Y	245347
SE-AC	271736
SE-S	282414
SE-U	275845
SE-AB	2377081
SE-E	465495
SE-I	59686
CH-GE	499480
CH-VD	799145
CH-NE	176850
CH-VS	343955
CH-LU	409557
CH-BE	1034977
CH-TI	353343
CH-NW	43223
CH-SO	273194
CH-ZH	1520968
CH-SG	507697
CH-GR	198379
SY-HL	4867000
SY-DI	2831738
SY-DY	1239000
SY-HA	1512000
SY-LA	1008000
SY-HI	1803000
TJ-RR	2120000
TJ-KT	3274900
TJ-SU	2658400
TH-24	720113
TH-10	5787932
TH-16	755556
TH-72	846334
TH-23	229958
TH-21	734753
TH-50	1779254
TH-58	284138
TH-52	738316
TH-55	478227
TH-54	441726
TH-57	1298304
TH-41	1586646
TH-67	992451
TH-76	485191
TH-60	1059887
TH-63	665620
TH-64	595072
TH-65	865247
TH-53	453103
TH-84	1068010
TH-96	808020
TH-86	511304
TH-80	1561927
TH-81	476739
TH-90	1435968
TH-94	725104
TH-83	416582
TH-85	193370
TH-92	643164
TH-47	1153390
TH-32	1396831
TH-40	1802872
TH-42	642950
TH-31	1595747
TH-30	6752546
TH-34	1878146
TH-45	1305211
TH-48	719136
TH-20	1558301
TL-LA	64135
TL-DI	252884
TL-CO	64550
TL-BA	124061
TL-BO	98932
TL-OE	72230
TL-VI	77402
TG-K	769940
TG-M	2599955
TO-01	4945
TO-04	74611
TO-02	6125
TO-03	1232
TO-05	13738
TT-WTO	60874
TT-TUP	215119
TN-32	401477
TN-52	548828
TN-11	1056247
TN-71	337331
TN-81	374300
TN-82	479520
TN-83	149453
TN-61	955421
TN-72	107912
TN-51	674971
TR-17	542157
TR-06	5639076
TR-01	2237940
TR-03	729483
TR-07	2511700
TR-27	2069364
TR-37	379405
TR-42	2232374
TR-05	337800
TR-58	638956
TR-67	596053
TR-44	800165
TR-38	1407409
TR-60	612747
TR-20	1037208
TR-50	303010
TR-34	15519267
TR-09	1110972
TR-16	3056120
TR-10	1228650
TR-26	887475
TR-35	4367251
TR-64	370509
TR-41	1953035
TR-48	983142
TR-59	1055412
TR-43	579257
TR-23	591098
TR-21	1756353
TR-24	234747
TR-25	762062
TR-36	285410
TR-61	808974
TR-63	2073614
TR-65	1136757
TR-72	608659
TR-49	408809
TR-56	330280
TR-57	218243
TR-46	1154102
TR-04	536199
TR-02	626465
TR-47	838778
TR-73	529615
TR-30	280991
TR-31	1628894
TR-32	444914
TR-55	1348542
TR-12	279812
TR-52	754198
TR-76	199442
TM-B	479500
TM-A	785800
TM-M	1287700
TM-D	1196700
TM-L	1160300
TC-GT	6135
TC-MC	6135
TC-NC	6135
TC-PN	6135
TC-PR	6135
TC-SC	6135
TC-SL	6135
TV-FUN	6320
UG-303	782077
UG-102	1507080
UG-304	436345
UG-204	471242
UG-409	291113
UG-406	694992
UG-410	472629
UG-211	296833
UG-212	517082
UG-309	139012
UA-53	1400439
UA-32	1767940
UA-14	4165901
UA-09	2151833
UA-23	1705836
UA-12	3206477
UA-43	1081418
UA-63	2675598
UA-59
UA-71	1206351
UA-35	945549
UA-18	1220193
UA-07	1035330
UA-68	1264705
UA-26	1373252
UA-46	2522021
UA-77	904374
UA-19
UA-21	1256802
UA-65	1037640
UA-48	1131096
UA-51	2380308
UA-74	1005745
UA-05	1560394
AE-DU	4177059
AE-AZ	2784490
AE-FU	152000
AE-RK	416600
AE-SH	2374132
GB-NIR	1893667
GB-ENG	56286961
GB-SCT	5463300
GB-WLS	3152879
GB-U-A
US-FL	21477737
US-AK	731545
US-CO	5758736
US-TX	28995881
US-MA	6892503
US-CA	39512223
US-AZ	7278717
US-IN	6732219
US-WA	7614893
US-IL	12671821
US-MO	6137428
US-LA	4648794
US-NY	19453561
US-OK	3956971
US-NC	10488084
US-PA	12801989
US-AL	4903185
US-NJ	8882190
US-MN	5639632
US-DC	705749
US-OR	4217737
US-KY	4467673
US-CT	3193694
US-VA	8535519
US-NV	308015
US-HI	1415872
US-MT	1068778
US-IA	3155070
US-MD	6045680
US-NE	1934408
US-MI	9986857
US-UT	3205958
US-WI	5822434
US-SD	884659
US-NM	2096829
US-GA	10617423
US-NH	1359711
US-WY	578759
US-AR	3017804
US-SC	5148714
US-OH	11689100
US-KS	2913314
US-TN	6829174
US-ND	762062
US-ME	1344212
US-RI	1059361
US-MS	2976149
US-WV	1792147
US-ID	1787065
US-VT	623989
US-DE	973764
UY-AR	73378
UY-CO	123203
UY-DU	57088
UY-MA	164300
UY-CL	84698
UY-CA	520187
UY-PA	113124
UY-RV	103493
UY-SA	124878
UY-TA	90053
UY-TT	48134
UY-RO	68088
UZ-AN	2965500
UZ-FA	3564800
UZ-NG	2652400
UZ-QR	1817500
UZ-XO	1776700
UZ-NW	942800
UZ-BU	1843500
UZ-QA	3088800
UZ-SA	3651700
[truncated: 155 more rows]
