# Supplementary material for: Dating the emergence of the first case of COVID-19 with flights: a retrospective modelling study&nbsp;
Source: Research Square preprint supplement (doi:10.21203/rs.3.rs-92854/v2), 2020-11-03
Supplement: Supplementary file 2 [file 55e9ccc677e1d46a0050808f.csv]

US	US-PA
US	US-KS
US	US-AK
US	US-AL
US	US-AR
US	US-OK
US	US-AZ
US	US-CA
US	US-CA
US	US-CA
US	US-CO
US	US-FL
US	US-FL
US	US-FL
US	US-GA
US	US-GA
US	US-HI
US	US-ID
US	US-KS
US	US-IN
US	US-IL
US	US-IN
US	US-IL
US	US-KS
US	US-KY
US	US-LA
US	US-IL
US	US-LA
US	US-MD
US	US-MI
US	US-MN
US	US-MO
US	US-MT
US	US-NJ
US	US-NC
US	US-NJ
US	US-NY
US	US-NY
US	US-OH
US	US-OH
US	US-OK
US	US-OR
US	US-PA
US	US-PA
US	US-PA
US	US-OR
US	US-SC
US	US-SD
US	US-TX
US	US-TX
US	US-TN
US	US-TX
US	US-TX
US	US-UT
US	US-VA
US	US-VA
US	US-WA
US	US-WA
US	US-WI
US	US-WA
US	US-WV
US	US-WY
US	US-TX
US	US-AK
US	US-AK
US	US-AL
US	US-AR
US	US-AZ
US	US-MI
US	US-CA
US	US-CA
US	US-CA
US	US-CO
US	US-CT
US	US-FL
US	US-FL
US	US-FL
US	US-GA
US	US-GA
US	US-IA
US	US-ID
US	US-IN
US	US-IL
US	US-IN
US	US-IL
US	US-FL
US	US-KS
US	US-KS
US	US-KY
US	US-LA
US	US-IL
US	US-LA
US	US-MA
US	US-MD
US	US-ME
US	US-MI
US	US-MN
US	US-MO
US	US-MT
US	US-NC
US	US-NE
US	US-NH
US	US-NJ
US	US-NM
US	US-NV
US	US-NY
US	US-OH
US	US-OK
US	US-OR
US	US-PA
US	US-PA
US	US-PA
US	US-SC
US	US-TX
US	US-TX
US	US-TN
US	US-TX
US	US-TX
US	US-NV
US	US-UT
US	US-VA
US	US-WA
US	US-WI
US	US-WA
US	US-WA
US	US-WY
US	US-TX
US	US-TX
US	US-AK
US	US-AL
US	US-AR
US	US-AZ
US	US-CA
US	US-MS
US	US-CA
US	US-CO
US	US-CT
US	US-FL
US	US-FL
US	US-GA
US	US-GA
US	US-HI
US	US-IA
US	US-ID
US	US-IN
US	US-IN
US	US-IL
US	US-KS
US	US-KY
US	US-KY
US	US-LA
US	US-LA
US	US-MA
US	US-MD
US	US-ME
US	US-MI
US	US-MN
US	US-MO
US	US-MS
US	US-MT
US	US-MO
US	US-NC
US	US-NE
US	US-NH
US	US-NJ
US	US-NV
US	US-NY
US	US-OH
US	US-OH
US	US-OK
US	US-OR
US	US-PA
US	US-PA
US	US-PA
PR	PR-U-A
US	US-PA
US	US-SC
US	US-MT
US	US-TX
US	US-TX
US	US-TN
US	US-TX
US	US-TX
US	US-UT
US	US-VA
US	US-VA
US	US-WA
US	US-WI
US	US-WA
US	US-TX
US	US-TX
US	US-AK
US	US-AK
US	US-AL
US	US-AR
US	US-AZ
US	US-CA
US	US-CO
US	US-FL
US	US-FL
US	US-FL
US	US-IN
US	US-OH
US	US-IA
US	US-ID
US	US-IN
US	US-IL
US	US-IN
US	US-IL
US	US-KS
US	US-KY
US	US-LA
US	US-LA
US	US-ME
US	US-MA
US	US-MD
US	US-ME
US	US-MI
US	US-MN
US	US-MO
US	US-MS
US	US-MT
US	US-MO
MH	MH-UTI	UTK
US	US-NC
US	US-ND
US	US-NE
US	US-NH
US	US-NJ
US	US-NV
US	US-NY
US	US-OH
US	US-OH
US	US-OK
US	US-OR
US	US-PA
US	US-PA
US	US-KS
US	US-PA
US	US-OR
US	US-SC
US	US-TX
US	US-TX
US	US-TN
US	US-TX
US	US-TX
US	US-UT
US	US-VA
US	US-WA
US	US-WI
US	US-WA
US	US-TX
US	US-AK
US	US-AL
US	US-AR
US	US-AZ
US	US-CA
US	US-CA
US	US-CT
US	US-TX
US	US-FL
US	US-FL
US	US-FL
US	US-OH
US	US-IA
US	US-ID
US	US-IN
US	US-IL
US	US-IN
US	US-IL
US	US-KS
US	US-KY
US	US-LA
US	US-IL
US	US-LA
US	US-MA
US	US-MD
US	US-ME
US	US-MI
US	US-MN
US	US-MO
US	US-MS
US	US-MT
US	US-NC
US	US-NE
US	US-NJ
US	US-NV
US	US-NY
US	US-OR
US	US-OH
US	US-OK
US	US-OR
US	US-PA
US	US-PA
US	US-SC
US	US-SD
US	US-TX
US	US-TX
US	US-TN
US	US-TX
US	US-TX
US	US-UT
US	US-CO
US	US-VA
US	US-VA
US	US-VT
US	US-MN
US	US-WA
US	US-WI
US	US-WA
US	US-WV
US	US-TX
US	US-AK
US	US-AL
US	US-AR
US	US-AZ
US	US-ME
US	US-CA
US	US-CA
US	US-CO
US	US-CT
US	US-FL
US	US-FL
US	US-FL
US	US-GA
US	US-IA
US	US-ID
US	US-IN
US	US-IL
US	US-IN
US	US-IL
US	US-KS
US	US-KY
US	US-LA
US	US-IL
US	US-LA
US	US-OK
US	US-MA
US	US-MD
US	US-ME
US	US-MN
US	US-MO
US	US-MS
US	US-MT
US	US-NC
US	US-NE
US	US-NH
US	US-NJ
US	US-NV
US	US-NY
US	US-OH
US	US-OK
US	US-OR
US	US-PA
US	US-PA
US	US-PA
US	US-OR
US	US-TX
US	US-TX
US	US-TN
US	US-TX
US	US-TX
US	US-UT
US	US-CO
US	US-VA
US	US-VT
US	US-WA
US	US-WI
US	US-WA
US	US-AR
US	US-MN
US	US-AK
US	US-AL
US	US-AR
US	US-AZ
US	US-ME
US	US-CA
US	US-CA
US	US-CO
US	US-FL
US	US-FL
US	US-FL
US	US-GA
US	US-IN
US	US-IA
US	US-ID
US	US-IL
US	US-IN
US	US-IL
US	US-KS
US	US-KY
US	US-LA
US	US-IL
US	US-LA
US	US-MA
US	US-MD
US	US-ME
US	US-MI
US	US-MN
US	US-MO
US	US-MT
US	US-NY
US	US-NC
US	US-ND
US	US-NE
US	US-NH
US	US-NJ
US	US-NV
US	US-NY
US	US-OH
US	US-OH
US	US-OH
US	US-OK
US	US-OR
US	US-PA
US	US-PA
US	US-PA
US	US-TX
US	US-KS
US	US-TX
US	US-TX
US	US-TN
US	US-TX
US	US-TX
US	US-VA
US	US-WA
US	US-WI
US	US-WA
US	US-TX
US	US-MN
US	US-AK
US	US-AL
US	US-AR
US	US-AZ
US	US-ME
US	US-CA
US	US-CA
US	US-CO
US	US-CT
US	US-MI
US	US-FL	OCA
US	US-FL
US	US-FL
US	US-GA
US	US-IN
US	US-ID
US	US-IN
US	US-IN
US	US-NE
US	US-KS
US	US-KY
US	US-LA
US	US-LA
US	US-MA
US	US-MD
US	US-ME
US	US-MI
US	US-MN
US	US-MO
US	US-MT
US	US-PA
US	US-NC
US	US-NH
US	US-NJ
US	US-NV
US	US-NY
US	US-OH
US	US-OK
US	US-OR
US	US-PA
US	US-KS
US	US-TX
US	US-TX
US	US-TN
US	US-TX
US	US-TX
US	US-UT
US	US-VA
US	US-VT
US	US-WA
US	US-WI
US	US-TX
US	US-MN
US	US-AK
US	US-AR
US	US-AZ
US	US-ME
US	US-CA
US	US-CA
US	US-CA
US	US-CO
US	US-CT
US	US-OK
US	US-FL
US	US-FL
US	US-FL
US	US-OH
US	US-GA
US	US-ID
US	US-IN
US	US-IL
US	US-IN
US	US-IL
US	US-KS
US	US-KY
US	US-LA
US	US-IL
US	US-LA
US	US-MA
US	US-MD
US	US-ME
US	US-MI
US	US-MN
US	US-MO
US	US-MS
US	US-MT
US	US-PA
US	US-NC
US	US-ND
US	US-NE
US	US-NH
US	US-NJ
US	US-NY
US	US-OH
US	US-OK
US	US-OK
US	US-OR
US	US-PA
US	US-PA
US	US-RI
US	US-TX
US	US-TX
US	US-TX
US	US-TX
US	US-NV
US	US-VA
US	US-WA
US	US-WI
US	US-TX
US	US-TX
US	US-AK
US	US-AK
US	US-AR
US	US-AZ
US	US-CA
US	US-CA
US	US-CA
US	US-CO
US	US-FL
US	US-FL
US	US-FL
US	US-GA
US	US-MN
US	US-IA
US	US-ID
US	US-IN
US	US-IL
US	US-IN
US	US-IL
US	US-KS
US	US-KY
US	US-LA
US	US-IL
US	US-LA
US	US-MA
US	US-ME
US	US-MI
US	US-MN
US	US-MO
US	US-NY
US	US-NC
US	US-NE
US	US-NJ
US	US-NC
US	US-NY
US	US-OK
US	US-OR
US	US-PA
US	US-PA
US	US-WA
US	US-TX
US	US-TX
US	US-TN
US	US-TX
US	US-TX
US	US-VA
US	US-VA
US	US-DC
US	US-WA
US	US-WI
US	US-TX
US	US-MN
US	US-AK
US	US-AK
US	US-AK	PQS
US	US-AK
US	US-AK
US	US-AK
US	US-AK
US	US-AK
US	US-AK
US	US-AK
US	US-AK
US	US-AK
US	US-AL
US	US-AL
US	US-AL
US	US-AL
US	US-AL
US	US-AL
US	US-AL
US	US-AL
US	US-AL
US	US-AL
US	US-AR
US	US-AR
US	US-AR
US	US-AR
US	US-AR
US	US-AR
US	US-AR
US	US-AR
US	US-AR
US	US-AR
US	US-AZ
US	US-AZ
US	US-AZ
US	US-AZ
US	US-AZ
US	US-AZ
US	US-AZ
US	US-ME
US	US-VT
US	US-MO
US	US-IL
US	US-MI
US	US-IL
US	US-IL
US	US-NJ
US	US-CA
US	US-CA
US	US-CA
US	US-CA
US	US-CA
US	US-CA
US	US-CA
US	US-CA
US	US-CA
US	US-CA
US	US-CO
US	US-CO
US	US-CO
US	US-CO
US	US-CO
US	US-CO
US	US-CO
US	US-CO
US	US-CO
US	US-CO
US	US-CA
US	US-CA
US	US-CA
US	US-CA
US	US-CA
US	US-CA
US	US-CA
US	US-CA
US	US-CA
US	US-CA
US	US-CA
US	US-CA
US	US-CO
US	US-CO
US	US-CO	CSE
US	US-CO
US	US-CO
US	US-CO
US	US-CO
US	US-CO
US	US-CO
US	US-CO
US	US-CT
US	US-CT
US	US-CT
US	US-CT
US	US-CT
US	US-CT
US	US-CT
US	US-CT
US	US-CT
US	US-CT
US	US-NE
US	US-OH
US	US-MI
US	US-IA
US	US-FL
US	US-FL
US	US-FL
US	US-FL
US	US-FL
US	US-FL
US	US-FL
US	US-FL
US	US-FL
US	US-FL
US	US-FL
US	US-FL
US	US-FL
US	US-FL
US	US-FL
US	US-FL
US	US-FL
US	US-FL
US	US-FL
US	US-FL
US	US-FL
US	US-FL
US	US-NY
US	US-MN
US	US-GA
US	US-GA
US	US-GA
US	US-GA
US	US-GA
US	US-GA
US	US-GA
US	US-GA
US	US-GA
US	US-GA
US	US-GA
US	US-GA
US	US-GA
US	US-GA
US	US-GA
US	US-GA
US	US-GA
US	US-MO
US	US-IN
US	US-IA
US	US-IA
US	US-IA
US	US-IA
US	US-IA
US	US-IA
US	US-IA
US	US-IA
US	US-IA
US	US-IA
US	US-ID
US	US-ID
US	US-ID
US	US-ID
US	US-ID
US	US-ID
US	US-ID
US	US-ID
US	US-ID
US	US-ID
US	US-IN
US	US-IN
US	US-IN
US	US-IN
US	US-IN
US	US-IN
US	US-IN
US	US-IN
US	US-IN
US	US-IL
US	US-IL
US	US-IL
US	US-IL
US	US-IL
US	US-IL
US	US-IL
US	US-IL
US	US-IL
US	US-IN
US	US-IN
US	US-IN
US	US-IN
US	US-IN
US	US-IN
US	US-IN
US	US-IN
US	US-IL
US	US-IL
US	US-IL
US	US-IL
US	US-IL
US	US-IL
US	US-IL
US	US-AL
US	US-FL
US	US-OK
US	US-KS
US	US-KS
US	US-KS
US	US-KS
US	US-KS
US	US-KS
US	US-KS
US	US-KS
US	US-KY
US	US-KY
US	US-KY
US	US-KY
US	US-KY
US	US-KY
US	US-KY
US	US-KY
US	US-KY
US	US-KY
US	US-NV
US	US-NV
US	US-LA
US	US-LA
US	US-LA
US	US-LA
US	US-LA
US	US-LA
US	US-LA
US	US-LA
US	US-LA
US	US-LA
US	US-LA
US	US-IL
US	US-IL
US	US-IL
US	US-IL
US	US-IL
US	US-IL
US	US-IL
US	US-IL
US	US-IL
US	US-LA
US	US-LA
US	US-LA
US	US-LA
US	US-LA
US	US-LA
US	US-LA
US	US-LA
US	US-LA
US	US-MA
US	US-MA
US	US-MA
US	US-MA
US	US-MA
US	US-MA
US	US-MA
US	US-MA
US	US-MD
US	US-MD
US	US-MD
US	US-MD
US	US-MD
US	US-MD
US	US-MD
US	US-MD
US	US-MD
US	US-MD
US	US-ME
US	US-MI
US	US-MI
US	US-MI
US	US-MI
US	US-MI
US	US-MI
US	US-MI
US	US-MI
US	US-MI
US	US-MN
US	US-MN
US	US-MN
US	US-MN
US	US-MN
US	US-MN
US	US-MN
US	US-MN
US	US-MN
US	US-MN
US	US-MO
US	US-MO
US	US-MO
US	US-MO
US	US-MO
US	US-MO
US	US-MO
US	US-MO
US	US-MO
US	US-MO
US	US-MS
US	US-MS
US	US-MS
US	US-MS
US	US-MS
US	US-MS
US	US-MS
US	US-MS
US	US-MS
US	US-MS
US	US-MT
US	US-MT
US	US-MT
US	US-MT
US	US-MT
US	US-MT
US	US-MT
US	US-MT
US	US-MT
US	US-MO
US	US-MO
US	US-MO
US	US-MO
US	US-MO
US	US-MO
US	US-MO
US	US-MO
US	US-MO
US	US-MN
US	US-MT
US	US-MO
US	US-DE
US	US-DE
US	US-DE
US	US-ND
US	US-ND
US	US-ND
US	US-NC
US	US-NC
US	US-NC
US	US-NC
US	US-NC
US	US-NC
US	US-NC
US	US-NC
US	US-NC
US	US-NC
US	US-ND
US	US-ND
US	US-ND
US	US-NE
US	US-NE
US	US-NE
US	US-NE
US	US-NE
US	US-NE
US	US-NE
US	US-NH
US	US-NJ
US	US-NJ
US	US-NJ
US	US-NJ
US	US-NJ
US	US-NJ
US	US-NJ
US	US-NJ
US	US-NJ
US	US-NJ
US	US-NY
US	US-NY
US	US-NY
US	US-NY
US	US-NY
US	US-NY
US	US-NY
US	US-NY
US	US-NY
US	US-NY
US	US-NM
US	US-NM
US	US-NV
US	US-NY
US	US-NY
US	US-NY
US	US-NY
US	US-NY
US	US-NY
US	US-NY
US	US-CA
US	US-CA
US	US-CA
US	US-OH
US	US-OH
US	US-OH
US	US-OH
US	US-OH
US	US-OH
US	US-OH
US	US-OH
US	US-OH
US	US-OH
US	US-OH
US	US-OH
US	US-OH
US	US-OH
US	US-OH
US	US-OK
US	US-OK
US	US-OK
US	US-OK
US	US-OK
US	US-OK
US	US-OK
US	US-OK
US	US-OK
US	US-OK
US	US-OR
US	US-OR
US	US-OR
US	US-OR
US	US-OR
US	US-OR
US	US-OR
US	US-OR
US	US-OR
US	US-PA
US	US-KS
US	US-PA
US	US-PA
US	US-PA
US	US-PA
US	US-PA
US	US-PA
US	US-PA
US	US-PA
US	US-PA
US	US-PA
US	US-PA
US	US-PA
US	US-PA
US	US-PA
US	US-PA
US	US-PA
US	US-PA
US	US-PA
US	US-PA
US	US-PA
US	US-PA
US	US-PA
US	US-PA
US	US-PA
US	US-PA
US	US-PA
US	US-PA
US	US-PA
US	US-PA
US	US-PA
US	US-PA
US	US-CA
US	US-CA
US	US-CA
US	US-CA
US	US-MO
US	US-LA
US	US-KS
US	US-MT
US	US-KS
US	US-ID
US	US-SD
US	US-SD
US	US-SD
US	US-SD
US	US-SD
US	US-SD
US	US-SD
US	US-SD
US	US-SD
US	US-SD
US	US-MO
US	US-TX
US	US-TX
US	US-TX
US	US-TX
US	US-TX
US	US-TX
US	US-TX
US	US-TX
US	US-TX
US	US-TX
US	US-TX
US	US-TX
US	US-TX
US	US-TX
US	US-TX
US	US-TX
US	US-TX
US	US-TX
US	US-TX	JCY
US	US-TX
US	US-TX
US	US-TN
US	US-TN
US	US-TN
US	US-TN
US	US-TN
US	US-TN
US	US-TN
US	US-TN
US	US-TN
US	US-TN
US	US-TX
US	US-TX
US	US-TX
US	US-TX
US	US-TX
US	US-TX
US	US-TX
US	US-TX
US	US-TX
US	US-TX
MP	MP-U-A
US	US-TX
US	US-TX
US	US-TX
US	US-TX
US	US-TX
US	US-TX
US	US-TX
US	US-TX
US	US-TX
US	US-TX
US	US-ID
US	US-ID
US	US-ID
US	US-ID
US	US-ID
US	US-ID
US	US-ID
US	US-VA
US	US-VA
US	US-VA
US	US-VA
US	US-VA
US	US-VA
US	US-VA
US	US-VA
US	US-VA
US	US-VA
US	US-VA
US	US-WA
US	US-WA
US	US-WA
US	US-WA
US	US-WA
US	US-WA
US	US-WA
US	US-WA
US	US-WA
US	US-WA
US	US-WA
US	US-WA
US	US-WI
US	US-WI
US	US-WI
US	US-WI
US	US-WI
US	US-WI
US	US-WI
US	US-WI
US	US-WI
US	US-WI
US	US-WA
US	US-WA
US	US-WA
US	US-WA
US	US-WI
US	US-WA
US	US-WA
US	US-ID
US	US-WA
US	US-WY
US	US-WY
US	US-TX
US	US-TX
US	US-TX
US	US-TX
US	US-TX
US	US-TX
US	US-TX
US	US-TX
US	US-TX
US	US-TX
US	US-TX
US	US-TX
US	US-TX
US	US-TX
US	US-TX
US	US-TX
US	US-TX
US	US-TX
US	US-TX
US	US-IA
US	US-IA
US	US-AK
US	US-AK
US	US-AK
US	US-AL
US	US-AR
US	US-AZ
US	US-CA
US	US-CA
US	US-CA
US	US-CO
US	US-MN
US	US-TX
US	US-FL
US	US-FL
US	US-FL
US	US-GA
US	US-IA
US	US-ID
US	US-IN
US	US-IL
US	US-IN
US	US-KS
US	US-KY
US	US-LA
US	US-LA
US	US-MA
US	US-ME
US	US-MI
US	US-MN
US	US-MO
US	US-MS
US	US-MT
US	US-MO
US	US-NC
US	US-ND
US	US-NE
US	US-NH
US	US-NJ
US	US-NC
US	US-NY
US	US-OH
US	US-OK
US	US-OR
US	US-PA
US	US-PA
US	US-SD
US	US-TX
US	US-TX
US	US-TN
US	US-TX
US	US-TX
US	US-UT
US	US-VA
US	US-VA
US	US-WA
US	US-WI
US	US-WY
US	US-TX
US	US-AK
US	US-AL
US	US-AR
US	US-AZ
US	US-CA
US	US-CA
US	US-CA
US	US-CO
US	US-FL
US	US-FL
US	US-FL
US	US-MI
US	US-GA
US	US-GA
US	US-ID
US	US-IN
US	US-IL
US	US-IN
US	US-IL
US	US-KS
US	US-KY
US	US-LA
US	US-IL
US	US-LA
US	US-MS
US	US-MA
US	US-MD
US	US-MI
US	US-MN
US	US-MO
US	US-MT
US	US-MO
US	US-CT
US	US-NC
US	US-NE
US	US-NJ
US	US-NY
US	US-NC
US	US-NY
US	US-OH
US	US-OR
US	US-OH
US	US-OK
US	US-OR
US	US-PA
US	US-PA
US	US-WA
US	US-TX
US	US-TX
US	US-TN
US	US-TX
US	US-TX
US	US-UT
US	US-VA
US	US-VA
US	US-WA
US	US-WI
US	US-WI
US	US-TX
US	US-WI
US	US-AR
US	US-AL
US	US-AR
US	US-AZ
US	US-CA
US	US-CA
US	US-CA
US	US-CO
US	US-FL
US	US-FL
US	US-FL
US	US-GA
US	US-GA
US	US-IN
US	US-IA
US	US-ID
US	US-IN
US	US-IL
US	US-IN
US	US-IL
US	US-NJ
US	US-KS
US	US-KY
US	US-LA
US	US-IL
US	US-LA
US	US-MA
US	US-MD
US	US-ME
US	US-MI
US	US-MN
US	US-MO
US	US-MS
US	US-MT
US	US-NC
US	US-ND
US	US-NE
US	US-NH
US	US-NJ
US	US-NY
US	US-NM
US	US-NY
US	US-OH
US	US-OH
US	US-OK
US	US-OR
US	US-PA
US	US-PA
PR	PR-U-A
US	US-PA
US	US-OR
US	US-SC
US	US-TX
US	US-TX
US	US-TX
US	US-TN
US	US-TX
US	US-TX
US	US-VA
US	US-WA
US	US-WI
US	US-WA
US	US-WV
US	US-WY
US	US-TX
US	US-AR
US	US-AK
US	US-AL
US	US-AR
US	US-AZ
US	US-CA
US	US-CA
US	US-CO
US	US-MI
US	US-FL
US	US-FL
US	US-FL
US	US-GA
US	US-GA
US	US-IA
US	US-ID
US	US-IN
US	US-IN
US	US-NJ
US	US-KS
US	US-KY
US	US-LA
US	US-IL
US	US-LA
US	US-MI
US	US-MA	PMX
US	US-ME
US	US-MI
US	US-MN
US	US-MO
US	US-MS
US	US-MT
US	US-NJ
US	US-NC
US	US-NE
US	US-NJ
US	US-NY
US	US-NM
US	US-NY
US	US-OH
US	US-OH
US	US-OK
US	US-OR
US	US-PA
US	US-PA
US	US-PA
US	US-NM
US	US-AK
US	US-SC
US	US-TX
US	US-TX
US	US-TN
US	US-TX
US	US-TX
US	US-VA
US	US-VA
US	US-WA
US	US-WA
US	US-WI
US	US-TX
US	US-MN
US	US-AK	WLR
US	US-AK
US	US-AL
US	US-AR
US	US-AZ
US	US-CA
US	US-CA
US	US-CO
US	US-CT
US	US-FL
US	US-FL
US	US-FL
US	US-GA
US	US-GA
US	US-OH
US	US-ID
US	US-IL
US	US-IN
US	US-IL
US	US-KS
US	US-KY
US	US-CA
US	US-LA
US	US-IL
US	US-LA
US	US-MA
US	US-ME
US	US-MI
US	US-MN
US	US-MO
US	US-MS
US	US-MT
US	US-PA
US	US-NC
US	US-ND
US	US-NE
US	US-NH
US	US-NJ
US	US-NY
US	US-NY
US	US-OH
US	US-OH
US	US-OK
US	US-OR
US	US-WV
US	US-PA
PR	PR-U-A
US	US-PA
US	US-WA
US	US-KS
US	US-TX
US	US-TX
US	US-TN
US	US-TX
US	US-TX
US	US-VA
US	US-WA
US	US-WI
US	US-WI
US	US-WV
US	US-TX
US	US-TX
US	US-AL
US	US-AK
US	US-AL
US	US-AR
US	US-AZ
US	US-CA
US	US-CA
US	US-CO
US	US-FL
US	US-FL
US	US-OH
US	US-GA
US	US-IA
US	US-ID
US	US-IN
US	US-IL
US	US-IN
US	US-KS
US	US-KY
US	US-LA
US	US-IL
US	US-LA
US	US-MA
US	US-ME
US	US-MI
US	US-MN
US	US-MO
US	US-MT
US	US-DE
US	US-NC
US	US-NE
US	US-NH
US	US-NJ
US	US-NY
US	US-NC
US	US-NY
US	US-OH
US	US-OH
US	US-OK
US	US-OR
US	US-PA
US	US-PA
US	US-PA
US	US-WA
US	US-SD
US	US-TX
US	US-TX
US	US-TN
US	US-TX
US	US-TX
US	US-VA
US	US-MI
US	US-WA
US	US-WI
US	US-TX
US	US-AK	NUP
US	US-AK
US	US-AL
US	US-AR
US	US-AZ
US	US-CA
US	US-CA
US	US-CO
US	US-DE
US	US-FL
US	US-FL
US	US-FL
US	US-GA
US	US-IA
US	US-ID
US	US-IN
US	US-IL
US	US-IN
US	US-IL
US	US-AK	PTC
US	US-KY
US	US-LA
US	US-IL
US	US-LA
US	US-MA
US	US-MD
US	US-ME
US	US-MI
US	US-MN
US	US-MO
US	US-MS
US	US-MT
US	US-NC
US	US-NE
US	US-NH
US	US-NJ
US	US-NY
US	US-NY
US	US-OH
US	US-OH
US	US-OK
US	US-OR
US	US-PA
US	US-PA
US	US-OR
US	US-SC
US	US-TX
US	US-TX
US	US-TN
US	US-TX
US	US-TX
US	US-VA
US	US-WA
US	US-WA
US	US-WI
US	US-TX
US	US-TX
US	US-TX
US	US-AK
US	US-AK
US	US-AL
US	US-AR
US	US-AZ
US	US-CA
US	US-CA
US	US-CO
US	US-FL
US	US-FL
US	US-FL
US	US-GA
US	US-ID
US	US-IN
US	US-IN
US	US-KS
US	US-KY
US	US-LA
US	US-IL
US	US-LA
US	US-MA
US	US-ME
US	US-MI
US	US-MN
US	US-MO
US	US-MS
US	US-MT
US	US-MO
US	US-NC
US	US-NE
US	US-NH
US	US-NJ
US	US-NY
US	US-NY
US	US-OH
US	US-OH
US	US-OK
US	US-OR
US	US-PA
US	US-PA
US	US-PA
US	US-OR
US	US-SC
US	US-SD
US	US-TX
US	US-TX
US	US-TN
US	US-TX
US	US-TX
US	US-UT
US	US-VA
US	US-WA
US	US-WI
US	US-TX
US	US-TX
US	US-AK
US	US-AK
US	US-AL
US	US-AR
US	US-AZ
US	US-CA
US	US-CA
US	US-CO
US	US-FL
US	US-FL
US	US-FL
US	US-GA
US	US-ID
US	US-IN
US	US-IL
US	US-IN
US	US-IL
US	US-WA
US	US-KS
US	US-KS
US	US-KY
US	US-LA
US	US-LA
US	US-MA
US	US-MD
US	US-ME
US	US-MI
US	US-MN
US	US-MO
US	US-MT
US	US-NC
US	US-NE
US	US-NJ
US	US-NY
US	US-OH
US	US-OH
US	US-OK
US	US-OR
US	US-PA
US	US-PA
US	US-SC
US	US-TX
US	US-TX
US	US-TN
US	US-TX
US	US-TX
US	US-VA
US	US-VT
US	US-WA
US	US-WI
US	US-WV
US	US-TX
US	US-TX
US	US-MN
US	US-AK	ICY
US	US-AL
US	US-AR
US	US-AZ
US	US-CA
US	US-CA
US	US-CO
US	US-FL
US	US-FL
US	US-GA
US	US-IA
US	US-ID
US	US-IN
US	US-IL
US	US-IN
US	US-IL
US	US-KS
US	US-KY
US	US-LA
US	US-IL
US	US-LA
US	US-MA
US	US-MI
US	US-MO
US	US-MT
US	US-NC
US	US-ND
US	US-NE
US	US-NH
US	US-NJ
US	US-NY
US	US-NY
US	US-OH
US	US-OH
US	US-OK
US	US-OR
US	US-AK	PPV
US	US-PA
US	US-PA
US	US-SC
US	US-MO
US	US-TX
US	US-TX
US	US-TN
US	US-TX
US	US-TX
US	US-VA
US	US-WA
US	US-WI
US	US-TX
US	US-NY
US	US-ND
US	US-NV
US	US-AK
US	US-AK
US	US-AK
US	US-AK
US	US-AK
US	US-AK
US	US-AK
US	US-AK
US	US-AK
US	US-AL
US	US-AL
US	US-AL
US	US-AL
US	US-AL
US	US-AL
US	US-AL
US	US-AL
US	US-AL
US	US-AL
US	US-AR
US	US-AR
US	US-AR
US	US-AR
US	US-AR
US	US-AR
US	US-AR
US	US-AR
US	US-AR
US	US-AR
US	US-AZ
US	US-AZ
US	US-AZ
US	US-AZ
US	US-AZ
US	US-AZ
US	US-AZ
US	US-AZ
US	US-AZ
US	US-VT
US	US-NH
US	US-NY
US	US-NY
US	US-MD
US	US-IL
US	US-CA
US	US-CA
US	US-CA
US	US-CA
US	US-CA
US	US-CA
US	US-CA
US	US-CA
US	US-CA
US	US-CA
US	US-CA
US	US-CO
US	US-CO
US	US-CO
US	US-CO
US	US-CO
US	US-CA
US	US-CA
US	US-CA
US	US-CA
US	US-CA
US	US-CA
US	US-CA
US	US-CA
US	US-CA
US	US-CO
US	US-CO
US	US-CO
US	US-CO
US	US-CO
US	US-CO
US	US-CO
US	US-CO
US	US-CO
US	US-CO
US	US-CT
US	US-CT
US	US-CT
US	US-MI
US	US-OH
US	US-NY
US	US-MN
US	US-DE
US	US-SC
US	US-TX
US	US-TX
US	US-NC
US	US-TX
US	US-NY
US	US-TX
US	US-OK
US	US-NY
US	US-NY
US	US-TX
US	US-FL
US	US-FL
US	US-FL
US	US-FL
US	US-FL
US	US-FL
US	US-FL
US	US-FL
US	US-FL
US	US-FL
US	US-FL
US	US-FL
US	US-FL
US	US-FL
US	US-FL
US	US-FL
US	US-FL
US	US-FL
US	US-FL
US	US-FL
US	US-FL
US	US-FL
US	US-NY
US	US-OH
US	US-GA
US	US-GA
US	US-GA
US	US-GA
US	US-GA
US	US-GA
US	US-GA
US	US-GA
US	US-GA
US	US-GA
US	US-GA
US	US-GA
US	US-GA
US	US-GA
US	US-GA
US	US-GA
US	US-GA
US	US-GA
US	US-GA
US	US-NY
US	US-NY
US	US-OK
US	US-WI
US	US-NY
US	US-IN
US	US-IN
US	US-IN
US	US-IN
US	US-IA
US	US-IA
US	US-IA
US	US-IA
US	US-IA
US	US-IA
US	US-IA
US	US-IA
US	US-ID
US	US-ID
US	US-ID
US	US-ID
US	US-ID
US	US-ID
US	US-ID
US	US-ID
US	US-IN
US	US-IN
US	US-IN
US	US-IN
US	US-IN
US	US-IN
US	US-IN
US	US-IN
US	US-IL
US	US-IL
US	US-IL
US	US-IL
US	US-IL
US	US-IL
US	US-IL
US	US-IL
US	US-IL
US	US-IN
US	US-IN
US	US-IN
US	US-IN
US	US-IN
US	US-IN
US	US-IN
US	US-IN
US	US-IL
US	US-IL
US	US-IL
US	US-IL
US	US-IL
US	US-IL
US	US-IL
US	US-FL
US	US-NJ
US	US-OR
US	US-NJ
US	US-NJ
US	US-NJ
US	US-KS
US	US-KS
US	US-OK
US	US-KS
US	US-OK
US	US-AK	KKK
US	US-KS
US	US-KS
US	US-KS
US	US-KS
US	US-KS
US	US-KS
US	US-KS
US	US-KS
US	US-KS
US	US-KS
US	US-KY
US	US-KY
US	US-KY
US	US-KY
US	US-KY
[truncated: 53,113 more rows]
